# Supplementary material
Source: MDPI journal article supplement (https://www.mdpi.com/2073-4344/13/8/1156)
Supplement: s1 [file s1]

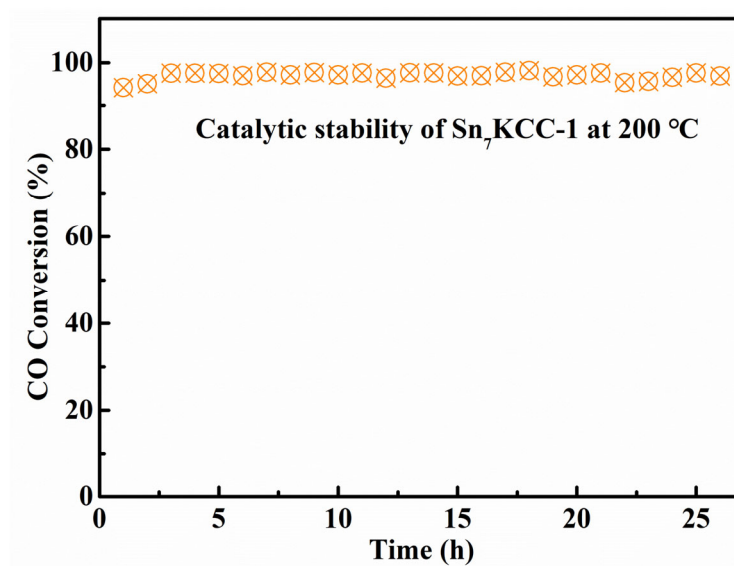

**Figure S1.** CO conversion stability at 200 °C of Sn<sub>7</sub>@KCC-1 catalyst in the condition of 1% CO + 21% O<sub>2</sub>, balanced by N<sub>2</sub>, and WHSV = 18,000 mL g<sub>cat</sub><sup>-1</sup> h<sup>-1</sup>.

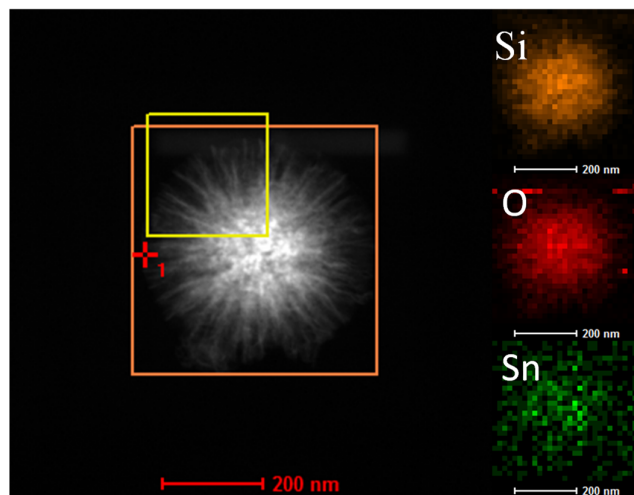

Figure S2. HAADF-STEM and EDX-mapping of Sn<sub>7</sub>@KCC-1.

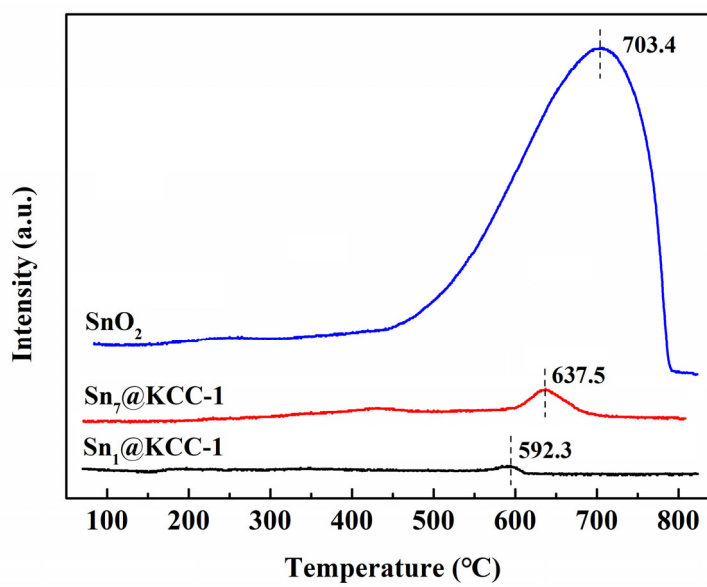

Figure S3. H<sub>2</sub>-TPR of Sn<sub>1</sub>@KCC-1, Sn<sub>7</sub>@KCC-1 and SnO<sub>2</sub> catalysts.
